# Supplementary figures and images for: Gene Flow Patterns among Aedes aegypti (Diptera: Culicidae) Populations in Sri Lanka
Source: MDPI journal article supplement (doi:10.3390/insects11030169), 2020-03-06

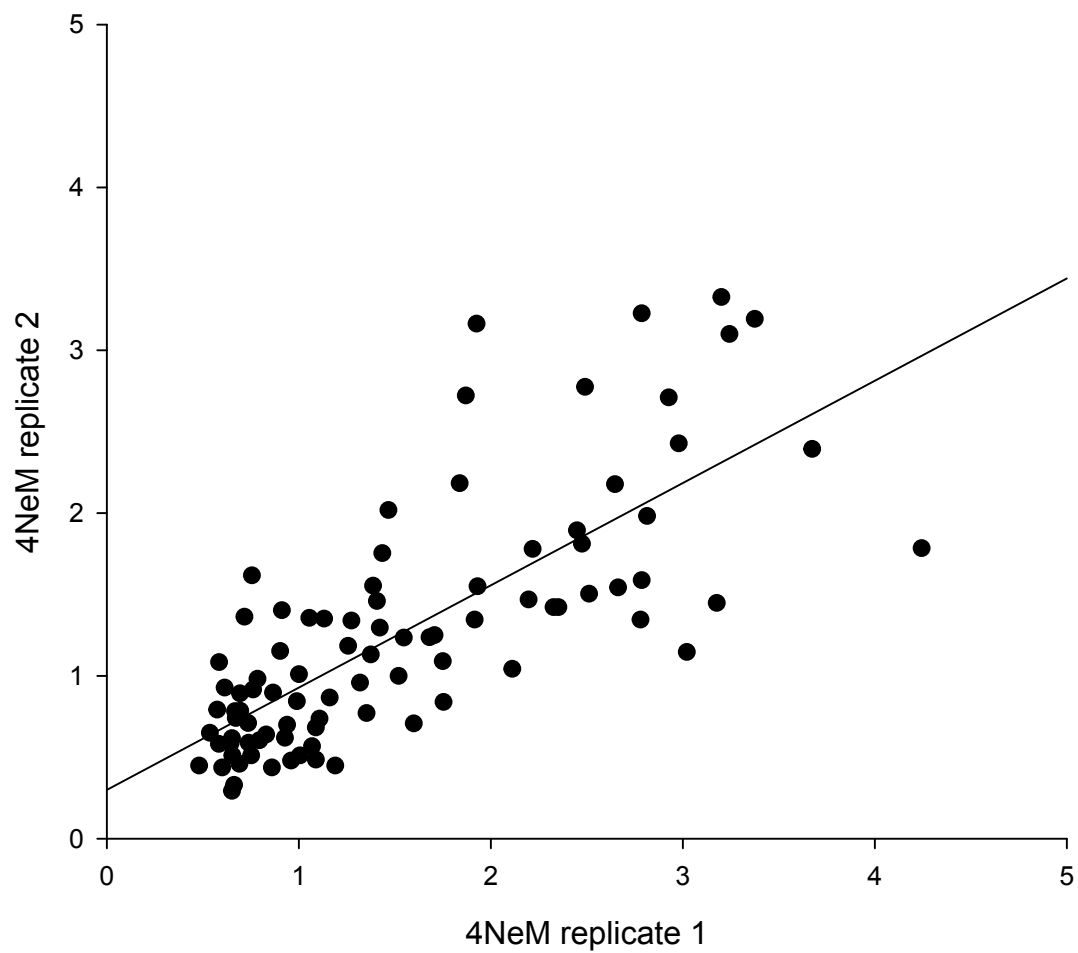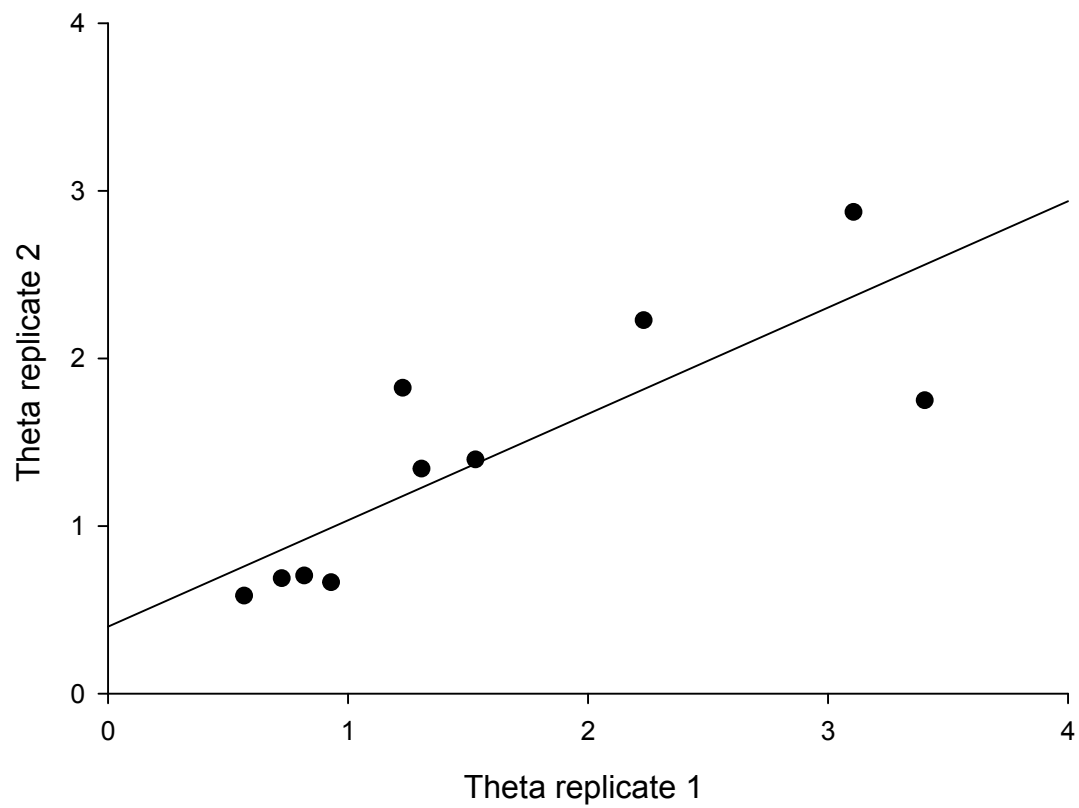

Supplement: s1 [file s1]
